# Supplementary material for: Al-modified mesoporous silica for efficient conversion of methanol to dimethyl ether
Source: Royal Society of Chemistry journal article supplement (doi:10.1039/c3ra22734k), 2013-01-01
Supplement: c3ra22734k.pdf [file c3ra22734k.pdf]

## Al-modified mesoporous silica for efficient conversion of methanol to dimethyl ether

Jérémy Faye<sup>a,b</sup>, Atsushi Takahashi<sup>a</sup>, Mickaël Capron<sup>c,d</sup>, Pascal Fongarland<sup>c,d,e</sup>, Franck Dumeignil<sup>\*c,d,f</sup>,  
Tadahiro Fujitani<sup>a</sup>

<sup>a</sup> *Research Institute for Innovation in Sustainable Chemistry, National Institute of Advanced Industrial Science and Technology, AIST Tsukuba West, 16-1 Onogawa, Tsukuba, Ibaraki, 305-8569, Japan.*

<sup>b</sup> *Current address: <sup>c,d</sup>.*

<sup>c</sup> *Univ. Lille Nord de France, F-59000 Lille, France.*

<sup>d</sup> *CNRS UMR 8181, Unité de Catalyse et Chimie du Solide, F-59655 Villeneuve d'Ascq Cedex, France. Fax: +33 3 20 43 65 61; Tel: +33 3 20 43 45 38; E-mail: franck.dumeignil@univ-lille1.fr.*

<sup>e</sup> *Current address: Université Lyon 1, CNRS UMR 5256, IRCELYON, Institut des Recherches sur la Catalyse et l'Environnement de Lyon, 2 avenue Albert Einstein, F-69626 Villeurbanne, France.*

<sup>f</sup> *Institut Universitaire de France, Maison des Universités, 103 boulevard Saint-Michel, F-75005 Paris, France.*

### I) Supplementary data for X-ray diffraction

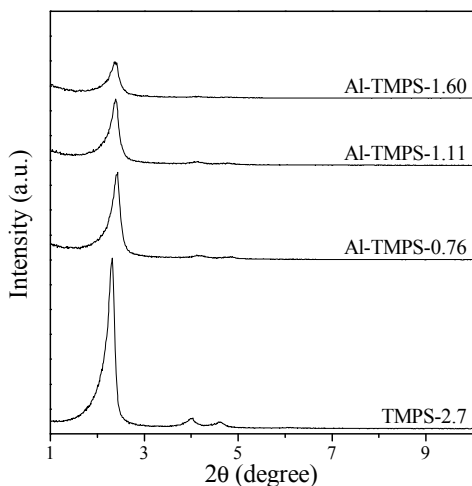

**Fig. S1** X-ray diffractograms obtained for the Al-TMPS solids.

## II) Supplementary data for N<sub>2</sub> physisorption

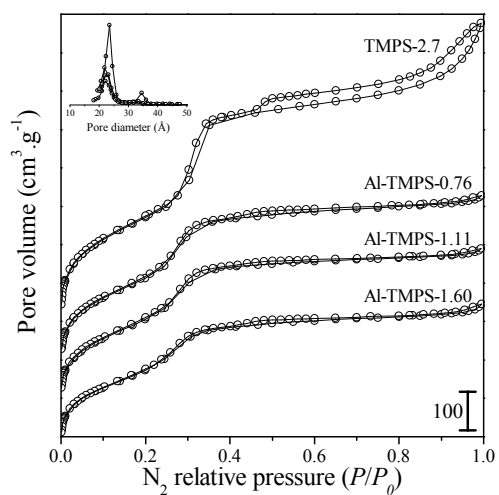

**Fig. S2** Nitrogen physisorption isotherms and pore size distributions for the Al-TMPS solids.

### III) Supplementary data for ammonia thermo-desorption

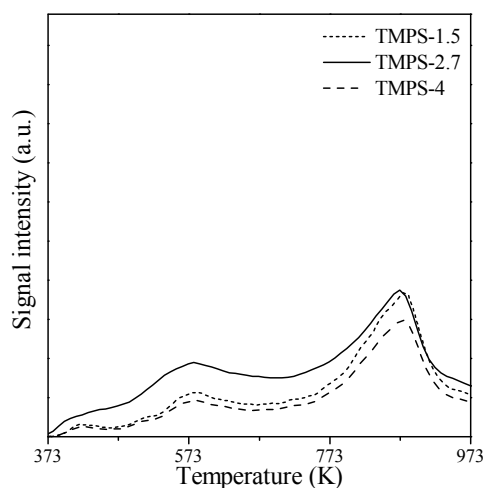

**Fig. S3** Ammonia temperature programmed desorption profiles for the TMPS solids.

The  $\text{NH}_3$ -TPD profiles of the aluminium-containing samples were fitted using the Origin 8.5 software. Four components were taken into account:

- weak sites, at  $\sim 446$  K (peak 1),
- medium sites, at  $\sim 528$  K (peak 2)
- strong sites with 2 components at 820-830 K (peak 3) and  $\sim 878$  K (peak 4).

The obtained curves are presented in Figure S4 and the peaks positions and relative area summarized in Table S1.

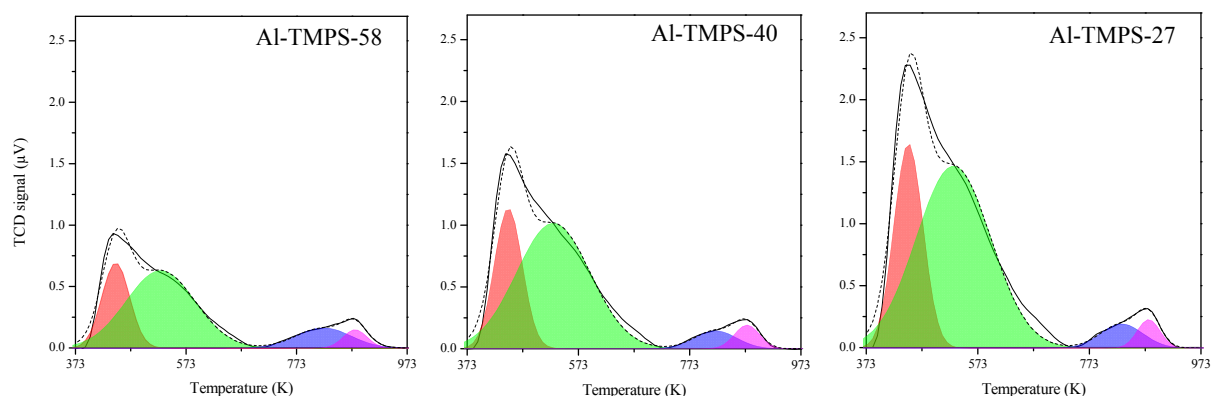

**Fig. S4** Curve fitting of the  $\text{NH}_3$ -TPD.

**Table S1.**  $\text{NH}_3$ -TPD profiles decomposition peaks properties for the Al-containing catalysts.

|            | Peak 1    |      |              | Peak 2    |      |              | Peak 3    |      |              | Peak 4    |      |              |
|------------|-----------|------|--------------|-----------|------|--------------|-----------|------|--------------|-----------|------|--------------|
|            | Temp. (K) | Area | Fraction (%) |
| Al-TMPS-58 | 446       | 43   | 25           | 527       | 99   | 58           | 822       | 20   | 12           | 879       | 8    | 5            |
| Al-TMPS-40 | 447       | 71   | 27           | 528       | 168  | 64           | 819       | 14   | 5            | 876       | 11   | 4            |
| Al-TMPS-27 | 449       | 107  | 28           | 530       | 245  | 64           | 831       | 19   | 5            | 879       | 12   | 3            |

#### IV) Catalytic activity in methanol conversion to dimethyl ether

the turn-over frequency (TOF), was calculated using the following formula:

$$\text{TOF} = \frac{r_{\text{MeOH}} \times \text{SSA}}{\text{TPD}}$$

with TOF : turn-over frequency ( $\text{s}^{-1}$ )  
 $r_{\text{MeOH}}$  : rate of methanol conversion ( $\text{mol} \cdot \text{s}^{-1} \cdot \text{m}^{-2}$ )  
 SSA : specific surface area ( $\text{m}^2$ )  
 TPD : acid site content (mol), determined by  $\text{NH}_3$ -TPD

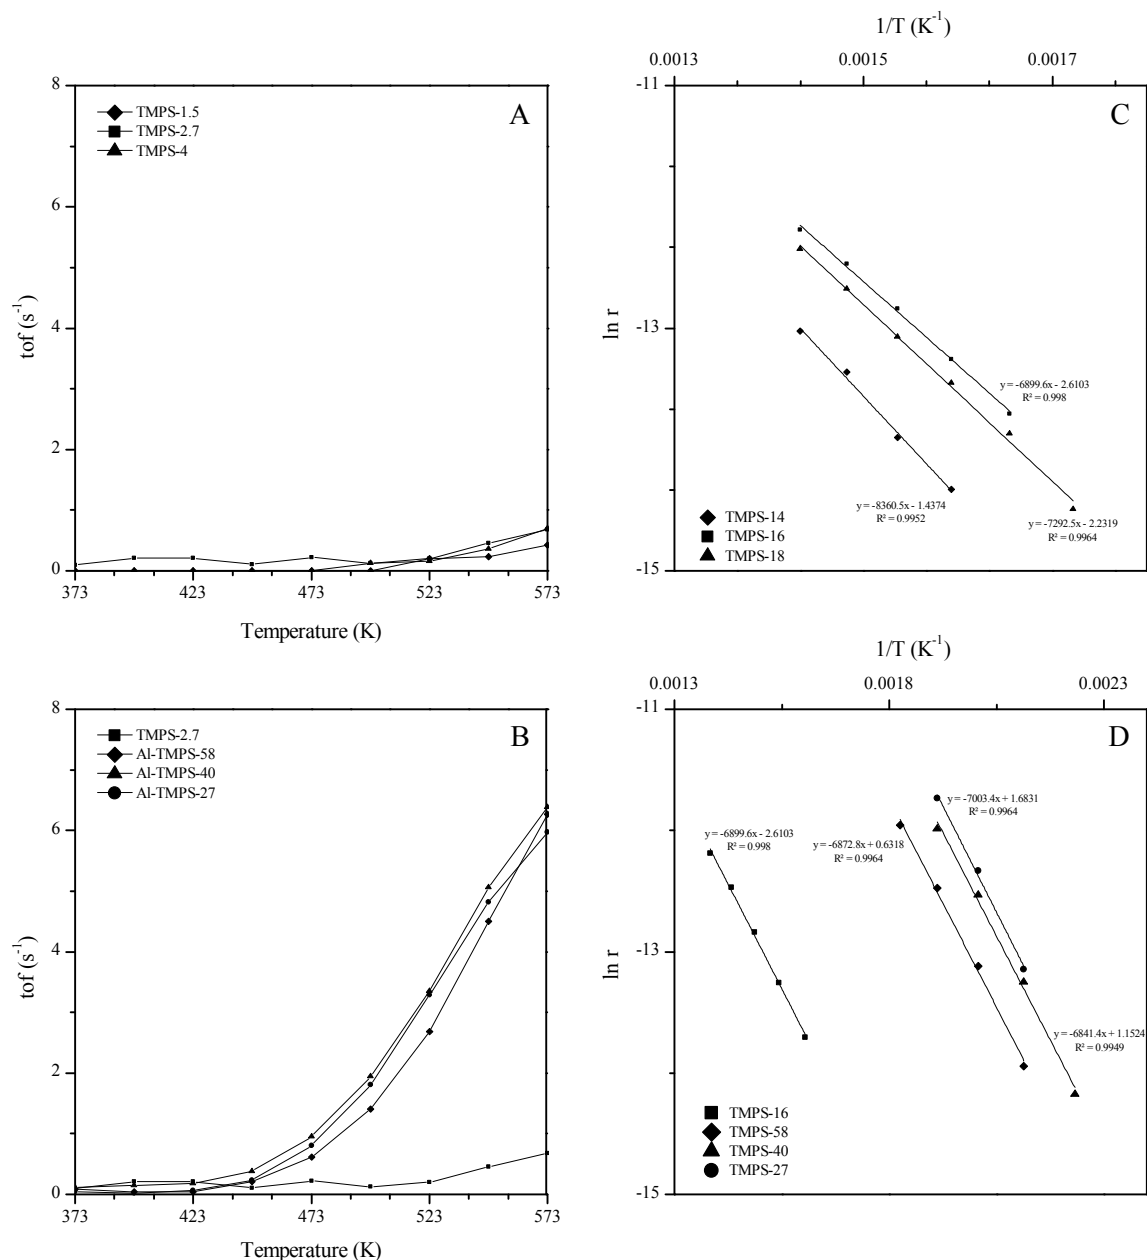

**Fig. S5** Catalytic activity of the silica and aluminosilicates: turnover frequencies as a function of temperature over A) TMPS solids, B) Al-TMPS solids, and associated Arrhenius plots in presence of C) TMPS solids and D) Al-TMPS solids.
